# Supplementary material for: Mapping cortical haemodynamics during neonatal seizures using diffuse optical tomography: A case study
Source: PubMed Central journal article supplement (PMC4141980; doi:10.1016/j.nicl.2014.06.012), 2014-07-06
Supplement: mmc1.pdf [file mmc1.pdf]

**Supplementary Table 1.** Tissue-specific optical properties

| Tissue         | 780 nm                      |                              | 850 nm                      |                              |
|----------------|-----------------------------|------------------------------|-----------------------------|------------------------------|
|                | $\mu_a$ (mm <sup>-1</sup> ) | $\mu_s'$ (mm <sup>-1</sup> ) | $\mu_a$ (mm <sup>-1</sup> ) | $\mu_s'$ (mm <sup>-1</sup> ) |
| Extra-cerebral | 0.0164                      | 0.8376                       | 0.0196                      | 0.7505                       |
| CSF            | 0.0023                      | 0.1013                       | 0.0035                      | 0.1660                       |
| GM             | 0.0183                      | 0.8032                       | 0.0192                      | 0.6726                       |
| WM             | 0.0175                      | 1.1548                       | 0.0021                      | 1.0107                       |

**Supplementary Data: HbT\_video.m4v.** A video showing the changes in HbT with time relative to a baseline defined as the first 30 seconds of recorded data. Three views of the cortical haemodynamics are provided along with the bipolar EEG data for the full hour of recording. The time point of the reconstructed images is indicated by the red vertical line superimposed over the EEG data. To produce this video the optical data was linearly detrended and down-sampled to 1 Hz. The video is sped up (30 times) such that the entire hour of data is shown in 120 seconds. A thumbnail for the video is shown below.
